# Supplementary figures and images for: The Genomic Landscape of Urothelial Carcinoma with High and Low ERBB2 Expression
Source: MDPI journal article supplement (doi:10.3390/cancers15245721), 2023-12-06

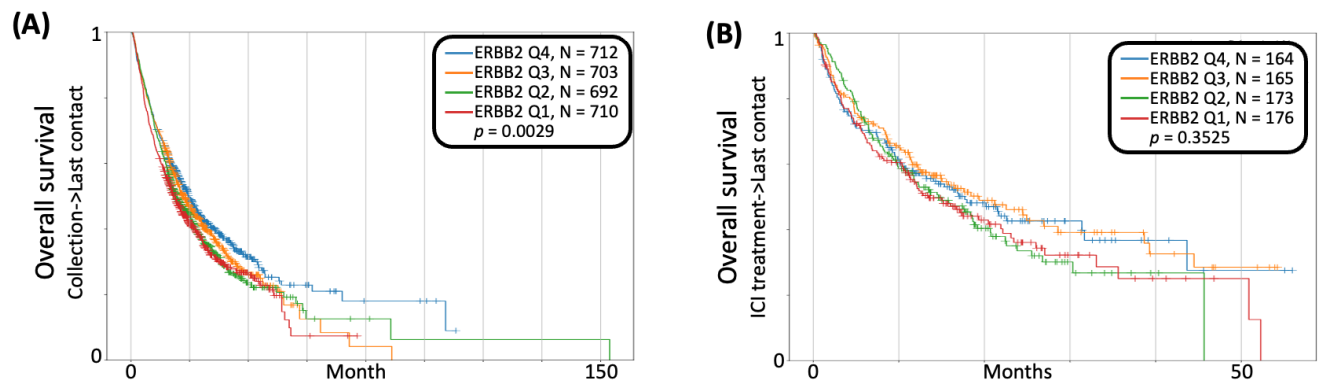

**Figure S1.** (A) OS for *ERBB2*-high vs *ERBB2*-low tumors. (B) Survival since treatment with ICI.

Supplement: s1 [file s1]
